# Supplementary material for: Long-Term Symptoms among COVID-19 Survivors in Prospective Cohort Study, Brazil
Source: PubMed Central journal article supplement (PMC8888217; doi:10.3201/eid2803.212020), 2022-03
Supplement: 21-2020-Techapp-s1.pdf [file 21-2020-Techapp-s1.pdf]

# Long-Term Symptoms among COVID-19 Survivors in Prospective Cohort Study, Brazil

## Appendix

### Variables of Interest

- Demographic, social, and economic data (age, sex, ethnicity, years of schooling, financial income/person)
  - Body mass index (kg/m<sup>2</sup>)
  - Underlying conditions including chronic heart disease (not hypertension); hypertension; diabetes; chronic lung disease; asthma; tuberculosis; chronic kidney disease; chronic liver disease; chronic neurologic disorder; asplenia; cancer; depression/anxiety; HIV; gastrointestinal disease/gastritis; dyslipidemia; thyroid disease; hearing problem or deficit; vision problem or deficit; stroke; prostatic hyperplasia; transplant; previous surgery; obesity (body mass index >30)
  - Smoking history
  - Hospitalization data
  - Laboratory tests, including hemoglobin, hematocrit, lymphocytes, leukocyte count, platelet count, C-reactive protein, lactate dehydrogenase, aspartate aminotransferase, alanine aminotransferase), D-dimer, urea, and creatinine.
  - Imaging exam: computed tomography

The chest computed tomography findings regarding the degree of severity and impairment of the lungs, such as those identifying viral pneumonia, were evaluated through consensus of 2 radiologists. Severity was evaluated according to the recommendations of the French Society of Thoracic Imaging.

## Abbreviated Version of the WHO Quality of Life Questionnaire (WHOQOL-Bref)

The WHOQOL Group created the WHO Quality of Life Questionnaire (WHOQOL-Bref) to develop a tool with satisfactory psychometric characteristics to assess quality of life in a shorter time (1–3).

This instrument is composed of 26 questions; the first 2 questions comprise a self-assessment of quality of life, while the remaining questions represent the facets of each of the domains evaluated: physical, psychological, social, and environmental relationships. The scores of the domains are calculated by summing the mean scores of “n” questions that make up each domain. The result is multiplied by 4, being represented on a scale from 4 to 20, where a score closer to 20 represents a better and more satisfactory overall quality of life and that of each domain evaluated (1–3).

### References

1. The WHOQOL Group. Development of the World Health Organization WHOQOL-BREF quality of life assessment. *Psychol Med.* 1998;28:551–8. [PubMed https://doi.org/10.1017/S0033291798006667](https://doi.org/10.1017/S0033291798006667)
2. Fleck MP, Louzada S, Xavier M, Chachamovich E, Vieira G, Santos L, et al. Application of the Portuguese version of the abbreviated instrument of quality of life WHOQOL-bref [in Portuguese]. *Rev Saude Publica.* 2000;34:178–83. [PubMed https://doi.org/10.1590/S0034-8910200000200012](https://doi.org/10.1590/S0034-8910200000200012)
3. Pedroso B, Pilatti LA, Gutierrez GL, Picinin CT. Calculating WHOQOL-BREF scores and descriptive statistics through Microsoft Excel [in Portuguese]. *Revista Brasileira de Qualidade de Vida.* 2010;2:31–6. <https://doi.org/10.3895/S2175-08582010000100004>

**Appendix Table 1.** World Health Organization classification of severity of the presentation of COVID-19\*

| WHO Clinical Classification | On the basis of available clinical records                                                                                                                                                                                                                                                                                                                                                                          | On the basis of self-report, if clinical records are not available   |
|-----------------------------|---------------------------------------------------------------------------------------------------------------------------------------------------------------------------------------------------------------------------------------------------------------------------------------------------------------------------------------------------------------------------------------------------------------------|----------------------------------------------------------------------|
| Mild                        | No hypoxia or pneumonia                                                                                                                                                                                                                                                                                                                                                                                             | Did not receive oxygen                                               |
| Moderate                    | Clinical signs of nonsevere pneumonia AND SpO <sub>2</sub> >90% on room air                                                                                                                                                                                                                                                                                                                                         | Did not receive oxygen                                               |
| Severe                      | Adults/adolescents: Clinical signs of severe pneumonia AND SpO <sub>2</sub> ≥30 breaths/min; Children: Clinical signs of severe pneumonia AND ≥1 of the following: central cyanosis; OR SpO <sub>2</sub> <90%; OR severe respiratory distress (e.g., fast breathing, grunting, very severe chest indrawing); OR general danger sign(s) (inability to breastfeed or drink, lethargy or unconsciousness, convulsions) | Received oxygen (or said they needed it, but it was not available)   |
| Critical                    | ARDS; OR sepsis/septic shock; OR pulmonary embolism, acute coronary syndrome, acute stroke; OR multi-inflammatory syndrome in children and adolescents temporally related to COVID-19                                                                                                                                                                                                                               | Received invasive ventilation (or max available respiratory support) |

\*Taken from World Health Organization Global COVID-19 Clinical Platform Case Report Form for Post COVID condition (Post COVID-19 CRF), [https://cdn.who.int/media/docs/default-source/3rd-edl-submissions/who\\_crf\\_postcovid\\_feb9\\_2021.pdf?sfvrsn=76afd14\\_1&download=true](https://cdn.who.int/media/docs/default-source/3rd-edl-submissions/who_crf_postcovid_feb9_2021.pdf?sfvrsn=76afd14_1&download=true). ARDS, acute respiratory distress syndrome; COVID-19, coronavirus disease; SpO<sub>2</sub>, oxygen saturation; WHO, World Health Organization.

**Appendix Table 2.** Data regarding previous hospital admission among 150 patients surviving the acute phase of COVID-19, Ribeirão Preto, Brazil, 2021

| Hospitalization Data                             | Total, n = 150 |
|--------------------------------------------------|----------------|
| Ventilatory support/oxygen therapy               |                |
| Yes                                              | 139 (92.7)     |
| No                                               | 11 (7.3)       |
| Admitted to the ICU                              | 76 (50.6)      |
| Mechanical ventilation                           |                |
| Yes                                              | 57 (38.0)      |
| No                                               | 93 (62.0)      |
| Mean duration of intubation, d (SD)              | 13.5 (±9)      |
| Median                                           | 10             |
| Need for vasoactive drugs/vasopressors           | 42 (28.0)      |
| Need for hemodialysis                            | 12 (8.0)       |
| Any complication during hospitalization          | 82 (54.6)      |
| Most common complications during hospitalization |                |
| Acute kidney injury                              | 23 (15.3)      |
| Bacterial pneumonia                              | 20 (13.3)      |
| Thromboembolic phenomena                         | 14 (9.3)       |
| Shock                                            | 12 (8.0)       |
| Cardiac arrhythmia                               | 7 (4.6)        |
| Anemia                                           | 6 (4.0)        |
| Convulsion                                       | 3 (2.0)        |
| Pericarditis/myocarditis                         | 2 (1.3)        |
| CT exam during hospitalization                   | Total, n = 61  |
| Viral pneumonia on CT                            |                |
| Consistent                                       | 56 (91.8)      |
| Nonsuggestive                                    | 2 (3.3)        |
| Indeterminate                                    | 3 (4.9)        |
| Severity on CT (SIT)                             | Total, n = 59† |
| Absent or minimal (<10%)                         | 3 (5.1)        |
| Moderate (10%–25%)                               | 9 (15.2)       |
| Extensive (25%–50%)                              | 26 (44.1)      |
| Severe (50%–75%)                                 | 21 (35.6)      |
| Critical (>75%)                                  | 0              |

\*Values are no. (%) except as indicated. CT, computed tomography; ICU, intensive care unit; SIT, French Society of Thoracic Imaging.

†In the 2 cases where CT results were considered nonsuggestive of viral pneumonia, the severity was not evaluated.

**Appendix Table 3.** Long-term clinical and laboratory parameters of COVID-19 survivors, Ribeirão Preto, Brazil, 2021\*

| Clinical Parameter                                 | COVID-19 Severity     |                    |                        | p value† | Total, n = 175      |
|----------------------------------------------------|-----------------------|--------------------|------------------------|----------|---------------------|
|                                                    | Mild/Moderate, n = 35 | Severe, n = 80     | Critical, n = 60       |          |                     |
| Respiratory frequency (n = 174)‡                   |                       |                    |                        |          |                     |
| Mean                                               | 17.3‡                 | 19.2               | 20                     |          | 19.1                |
| Min–Max                                            | 12–34                 | 10–32              | 12–32                  |          | 10–34               |
| Median (IQR)                                       | 16.5 (14–18.5)        | 18 (16–22)         | 20 (16–23.75)          | 0.012§   | 18 (16–22)          |
| Oxygen saturation in ambient air, n = 174‡         |                       |                    |                        |          |                     |
| <92%                                               | 0/35                  | 1/79‡              | 0/60                   |          | 1/174               |
| 92%–94%                                            | 0/35                  | 5/79               | 2/60                   |          | 7/174               |
| ≥95%                                               | 35/35                 | 73/79              | 58/60                  |          | 166/174             |
| Median (IQR)                                       | 98 (97–99)            | 98 (96–99)         | 98 (97–99)             | 0.088    | 98 (97–99)          |
| Heart rate, n = 173‡                               |                       |                    |                        |          |                     |
| Mean                                               | 77.8‡                 | 78.2‡              | 87.7                   |          | 81.4                |
| Min-max                                            | 50–103                | 50–112             | 53–117                 |          | 50–117              |
| Median (IQR)                                       | 78.5 (69.5–84.5)      | 78 (71–85)         | 87.5 (77.25–98.75)     | >0.001§  | 81 (72–88)          |
| Blood pressure, n = 172‡                           |                       |                    |                        |          |                     |
| SBP≥140 mm Hg                                      | 7/33‡                 | 20/79‡             | 15/60                  |          | 42/172              |
| DBP≥90 mm Hg                                       | 9/33                  | 28/79              | 21/60                  |          | 58/172              |
| SBP≤100 mm H                                       | 5/33                  | 13/79              | 10/60                  |          | 28/172              |
| DBP≤70 mm Hg                                       | 9/33                  | 31/79              | 23/60                  |          | 63/172              |
| Median SBP (IQR)                                   | 120 (110–130)         | 120 (110–140)      | 120 (110–137.5)        | 0.623    | 120 (110–130)       |
| Median DBP (IQR)                                   | 80 (70–90)            | 80 (70–90)         | 80 (70–90)             | 0.943    | 80 (70–90)          |
| Laboratory tests                                   | Mild/Moderate, n = 19 | Severe, n = 56     | Critical, n = 37       | p value† | Total, n = 112      |
| Hemoglobin (ref: 13.9–17.7 g/dL)                   |                       |                    |                        |          |                     |
| Median (IQR)                                       | 13.7 (12.4–14.3)      | 13 (12.2–14.2)     | 12.9 (10.8–13.9)       | 0.396    | 13 (12.1–14.1)      |
| Hematocrit (ref: 39.6%–51.8%)                      |                       |                    |                        |          |                     |
| Median (IQR)                                       | 42 (37–43)            | 40 (37–42)         | 40 (34–43)             | 0.668    | 40 (36–42)          |
| Leukocytes (ref: 3.79–10.33 × 10 <sup>3</sup> /μL) |                       |                    |                        |          |                     |
| Median (IQR)                                       | 6.7 (5–7.8)           | 6.4 (5.2–8.3)      | 7.7 (6.3–9.7)          | 0.065    | 6.8 (5.5–8.6)       |
| Lymphocytes (ref: 1.07–3.12 × 10 <sup>3</sup> /μL) |                       |                    |                        |          |                     |
| Median (IQR)                                       | 1.8 (1.6–2.6)         | 1.7 (1.3–2)        | 2.2 (1.7–2.8)          | 0.001§   | 1.8 (1.4–2.4)       |
| Platelets (ref: 166–389 × 10 <sup>3</sup> /μL)     |                       |                    |                        |          |                     |
| Median (IQR)                                       | 293 (219–337)         | 239 (191–332)      | 291 (233–374)          | 0.113    | 268 (202–341)       |
| C-reactive protein (ref: <1.0 mg/dL)               |                       |                    |                        |          |                     |
| Median (IQR)                                       | 0.4 (0.4–1.6)         | 0.9 (0.4–2.3)      | 1.4 (0.4–2.9)          | 0.128    | 0.9 (0.4–2.3)       |
| LDH (ref: 120–246 U/L)                             |                       |                    |                        |          |                     |
| Median (IQR)                                       | 185.8 (178–237.8)     | 231.35 (204.2–270) | 252.55 (202.25–310.05) | 0.024§   | 236.8 (195.3–289.9) |
| AST (ref: <38.0 U/L)                               |                       |                    |                        |          |                     |
| Median (IQR)                                       | 22 (16–32)            | 24.95 (20–34)      | 23.8 (18.2–29.9)       | 0.219    | 24 (18.5–33)        |
| ALT (ref: 10–49 U/L)                               |                       |                    |                        |          |                     |
| Median (IQR)                                       | 22 (12.5–44.5)        | 40.2 (25–62)       | 27.5 (17.95–48)        | 0.023§   | 35.7 (21–50.1)      |
| D-dimer (ref: ≤0.5 UG/ml)                          |                       |                    |                        |          |                     |
| Median (IQR)                                       | 0.37 (0.31–0.8)       | 0.73 (0.52–0.99)   | 0.92 (0.44–2.54)       | 0.021§   | 0.735 (0.41–1.27)   |
| Urea (ref: 19–49 mg/dL)                            |                       |                    |                        |          |                     |
| Median (IQR)                                       | 30.17 (24.4–37.24)    | 31.88 (25.47–40)   | 32.96 (24.8–40.87)     | 0.696    | 31.78 (25.02–40.76) |
| Creatinine (ref: 0.70–1.30 mg/dL)                  |                       |                    |                        |          |                     |
| Median (IQR)                                       | 0.78 (0.73–0.96)      | 0.87 (0.75–0.97)   | 0.88 (0.74–0.95)       | 0.766    | 0.865 (0.735–0.96)  |

\*ALT, alanine aminotransferase; AST, aspartate aminotransferase; COVID-19, coronavirus disease; DBP, diastolic blood pressure; IQR, interquartile range; LDH, lactate dehydrogenase; SBP, systolic blood pressure.

†P values calculated by using the Kruskal–Wallis test.

‡‡Missing value.

§p<0.05.

**Appendix Table 4.** Results of the WHOQOL questionnaire domains (4–20 pts) in inclusion data of COVID-19 survivors, Ribeirão Preto, Brazil, 2021\*

| Domains                            | Mean  | SD   | Minimum value | Maximum value |
|------------------------------------|-------|------|---------------|---------------|
| Physical domain                    | 12.63 | 1.86 | 7.43          | 17.71         |
| Psychological domain               | 13.89 | 1.94 | 7.33          | 18.00         |
| Social relationships domain        | 15.72 | 2.78 | 4.00          | 20.00         |
| Environment domain                 | 14.42 | 2.17 | 8.50          | 19.50         |
| Self-assessment of quality of life | 14.49 | 2.89 | 4.00          | 20.00         |
| Total                              | 13.97 | 1.65 | 8.62          | 18.15         |

\*COVID-19, coronavirus disease; WHOQOL, World Health Organization Quality of Life.

**Appendix Table 5.** Results of WHOQOL questionnaire self-evaluation inclusion data of COVID-19 survivors, Ribeirão Preto, Brazil, 2021

| Quality of Life Assessment                       | Before COVID-19, n = 175 | After COVID-19, n = 171 |
|--------------------------------------------------|--------------------------|-------------------------|
| Very poor                                        | 1 (0.6)                  | 5 (2.9)                 |
| Poor                                             | 3 (1.7)                  | 6 (3.5)                 |
| Neither poor nor good                            | 29 (16.6)                | 43 (25.2)               |
| Good                                             | 113 (64.5)               | 96 (56.1)               |
| Very good                                        | 29 (16.6)                | 21 (12.3)               |
| Satisfaction with your health (in the past 15 d) |                          |                         |
| Very dissatisfied                                |                          | 4 (2.3)                 |
| Dissatisfied                                     |                          | 20 (11.7)               |
| Neither satisfied nor dissatisfied               |                          | 50 (29.3)               |
| Satisfied                                        |                          | 78 (45.6)               |
| Very satisfied                                   |                          | 19 (11.1)               |

\*Values are no. (%). COVID-19, coronavirus disease; WHOQOL, World Health Organization Quality of Life.
